# Supplementary material for: Hydrogen-rich solution attenuates cold ischemia-reperfusion injury in rat liver transplantation
Source: Springer Nature journal article supplement (doi:10.1186/s12876-019-0939-7), 2019-02-08
Supplement: MOESM1 [file 16460056]

**Statistical analyses (Tukey's test)**

|                  |                   |            | n  | P      |
|------------------|-------------------|------------|----|--------|
| H2 concentration | UW bag H2         | UW         | 6  | 0.0000 |
|                  |                   | UW storage | 6  | 0.0040 |
|                  | UW storage bag H2 | UW         | 6  | 0.0000 |
|                  |                   | UW bag     | 6  | 0.0040 |
| AST              | UW                | naïve      | 3  | 0.0002 |
|                  |                   | np         | 4  | 0.0002 |
|                  |                   | UW+H2      | 12 | 0.0002 |
|                  | UW+H2             | naïve      | 3  | 0.3181 |
|                  |                   | np         | 4  | 0.5835 |
|                  |                   | UW         | 6  | 0.0002 |
| ALT              | UW                | naïve      | 3  | 0.0000 |
|                  |                   | np         | 4  | 0.0000 |
|                  |                   | UW+H2      | 12 | 0.0000 |
|                  | UW+H2             | naïve      | 3  | 0.1098 |
|                  |                   | np         | 4  | 0.1498 |
|                  |                   | UW         | 6  | 0.0000 |
| LDH              | UW                | naïve      | 3  | 0.0002 |
|                  |                   | np         | 4  | 0.0001 |
|                  |                   | UW+H2      | 12 | 0.0003 |
|                  | UW+H2             | naïve      | 3  | 0.2917 |
|                  |                   | np         | 4  | 0.3154 |
|                  |                   | UW         | 6  | 0.0003 |
| IRI score        | UW                | naïve      | 12 | 0.0000 |
|                  |                   | np         | 12 | 0.0000 |
|                  |                   | UW+H2      | 18 | 0.0002 |
|                  | UW+H2             | naïve      | 12 | 0.0001 |
|                  |                   | np         | 12 | 0.5893 |
|                  |                   | UW         | 18 | 0.0002 |
| ASD              | UW                | naïve      | 3  | 0.0000 |
|                  |                   | np         | 3  | 0.1847 |
|                  |                   | UW+H2      | 3  | 0.0009 |
|                  | UW+H2             | naïve      | 3  | 0.0023 |
|                  |                   | np         | 3  | 0.0001 |
|                  |                   | UW         | 3  | 0.0009 |
| ED1              | UW                | naïve      | 3  | 0.0003 |
|                  |                   | np         | 3  | 0.8731 |
|                  |                   | UW+H2      | 3  | 0.0025 |
|                  | UW+H2             | naïve      | 3  | 0.1180 |
|                  |                   | np         | 3  | 0.0089 |
|                  |                   | UW         | 3  | 0.0025 |

|          |       |       |   |        |
|----------|-------|-------|---|--------|
| TUNEL    | UW    | naïve | 3 | 0.0387 |
|          |       | np    | 3 | 0.6172 |
|          |       | UW+H2 | 3 | 0.7165 |
|          | UW+H2 | naïve | 3 | 0.1732 |
|          |       | np    | 3 | 0.1732 |
|          |       | UW    | 3 | 0.7165 |
| CCL2     | UW    | naïve | 3 | 0.1870 |
|          |       | np    | 4 | 0.2315 |
|          |       | UW+H2 | 5 | 0.8896 |
|          | UW+H2 | naïve | 3 | 0.4449 |
|          |       | np    | 4 | 0.0770 |
|          |       | UW    | 5 | 0.8896 |
| ICAM1    | UW    | naïve | 3 | 0.0148 |
|          |       | np    | 4 | 0.6505 |
|          |       | UW+H2 | 5 | 0.5709 |
|          | UW+H2 | naïve | 3 | 0.1127 |
|          |       | np    | 4 | 0.9999 |
|          |       | UW    | 5 | 0.5709 |
| VCAM1    | UW    | naïve | 3 | 0.0122 |
|          |       | np    | 3 | 0.0605 |
|          |       | UW+H2 | 3 | 0.5093 |
|          | UW+H2 | naïve | 3 | 0.0891 |
|          |       | np    | 3 | 0.4187 |
|          |       | UW    | 3 | 0.5093 |
| HO1      | UW    | naïve | 3 | 0.0387 |
|          |       | np    | 4 | 0.9245 |
|          |       | UW+H2 | 5 | 0.2652 |
|          | UW+H2 | naïve | 3 | 0.0019 |
|          |       | np    | 4 | 0.6394 |
|          |       | UW    | 5 | 0.2652 |
| SIRT1    | UW    | naïve | 3 | 0.4623 |
|          |       | np    | 3 | 0.0848 |
|          |       | UW+H2 | 3 | 0.3902 |
|          | UW+H2 | naïve | 3 | 0.0488 |
|          |       | np    | 3 | 0.6751 |
|          |       | UW    | 3 | 0.3902 |
| HO1WB    | UW    | naïve | 3 | 0.9985 |
|          |       | np    | 3 | 0.0122 |
|          |       | UW+H2 | 3 | 0.0000 |
|          | UW+H2 | naïve | 3 | 0.0000 |
|          |       | np    | 3 | 0.0000 |
|          |       | UW    | 3 | 0.0000 |
| MDAserum | UW    | naïve | 3 | 0.8843 |
|          |       | np    | 3 | 0.3690 |
|          |       | UW+H2 | 3 | 0.0419 |
|          | UW+H2 | naïve | 3 | 0.1492 |
|          |       | np    | 3 | 0.6058 |
|          |       | UW    | 5 | 0.0419 |

|          |       |       |   |        |
|----------|-------|-------|---|--------|
| MDAliver | UW    | naïve | 3 | 0.1109 |
|          |       | np    | 4 | 0.0311 |
|          |       | UW+H2 | 6 | 0.9964 |
|          | UW+H2 | naïve | 3 | 0.1510 |
|          |       | np    | 4 | 0.0436 |
|          |       | UW    | 6 | 0.9964 |
| 8OHdG    | UW    | naïve | 3 | 0.0001 |
|          |       | np    | 3 | 0.0004 |
|          |       | UW+H2 | 4 | 0.2074 |
|          | UW+H2 | naïve | 3 | 0.0008 |
|          |       | np    | 3 | 0.0051 |
|          |       | UW    | 5 | 0.2074 |
| 4HNE     | UW    | naïve | 3 | 0.0531 |
|          |       | np    | 3 | 0.1003 |
|          |       | UW+H2 | 3 | 0.1609 |
|          | UW+H2 | naïve | 3 | 0.8571 |
|          |       | np    | 3 | 0.0042 |
|          |       | UW    | 3 | 0.1609 |
